# Supplementary material for: Ultra-high Li storage capacity achieved by hollow carbon capsules with hierarchical nanoarchitecture
Source: Royal Society of Chemistry journal article supplement (doi:10.1039/c1jm13753k), 2011-01-01
Supplement: c1jm13753k.pdf [file c1jm13753k.pdf]

This journal is © The Royal Society of Chemistry 2011

## **Ultra-high Li storage capacity demonstrated by hollow carbon capsules with hierarchical nanoarchitecture†**

Min-Sik Kim,<sup>a</sup> Baizeng Fang,<sup>a,b</sup> Jung Ho Kim,<sup>a</sup> Dae-Soo Yang,<sup>a</sup> Yun Kyung Kim,<sup>a</sup>

Tae-Sung Bae<sup>c</sup> and Jong-Sung Yu<sup>\*a</sup>

<sup>a</sup>Energy material Lab., Department of Advanced Materials Chemistry, Korea University, 208 Seochang, Jochiwon, ChungNam 339-700, Republic of Korea.

E-mail: [jsyu212@korea.ac.kr](mailto:jsyu212@korea.ac.kr) Fax: +82-41-867-5396; Tel: +82-41-860-149

<sup>b</sup>*Department of Chemical & Biological Engineering, University of British Columbia, 2360 East Mall, Vancouver, B.C., Canada V6T 1Z3*

<sup>c</sup> Korea Basic Science Institute, Jeonju, Jeonbuk 561-756, Republic of Korea

### Supporting Information

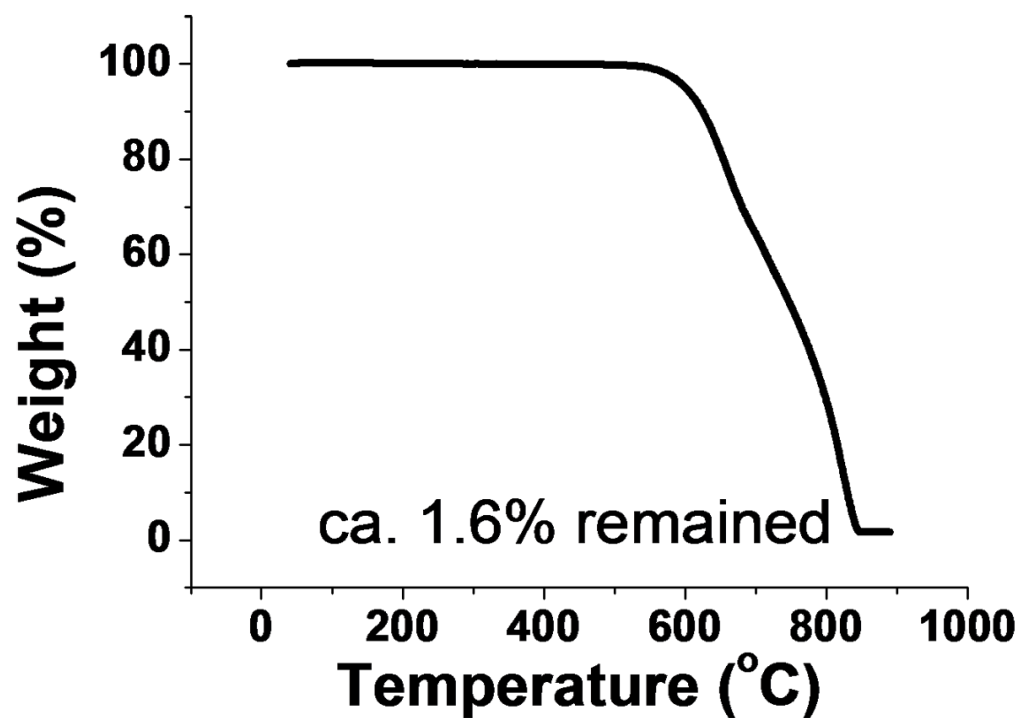

Fig. S1 Thermogravimetric analysis curves for the HCMSC.

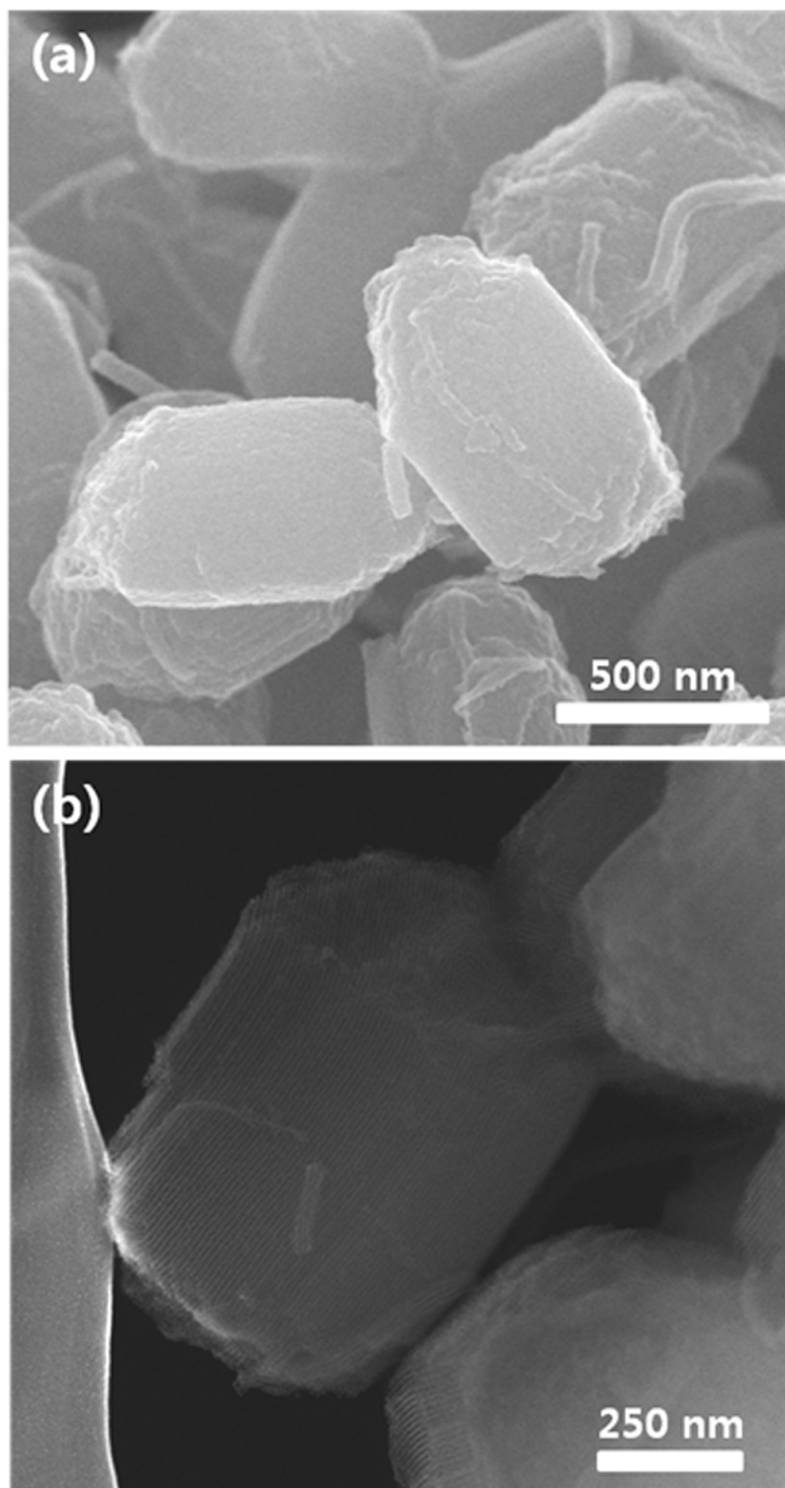

**Fig. S2** Representative SEM (a) and UHR-SEM (b) images for CMK-3.

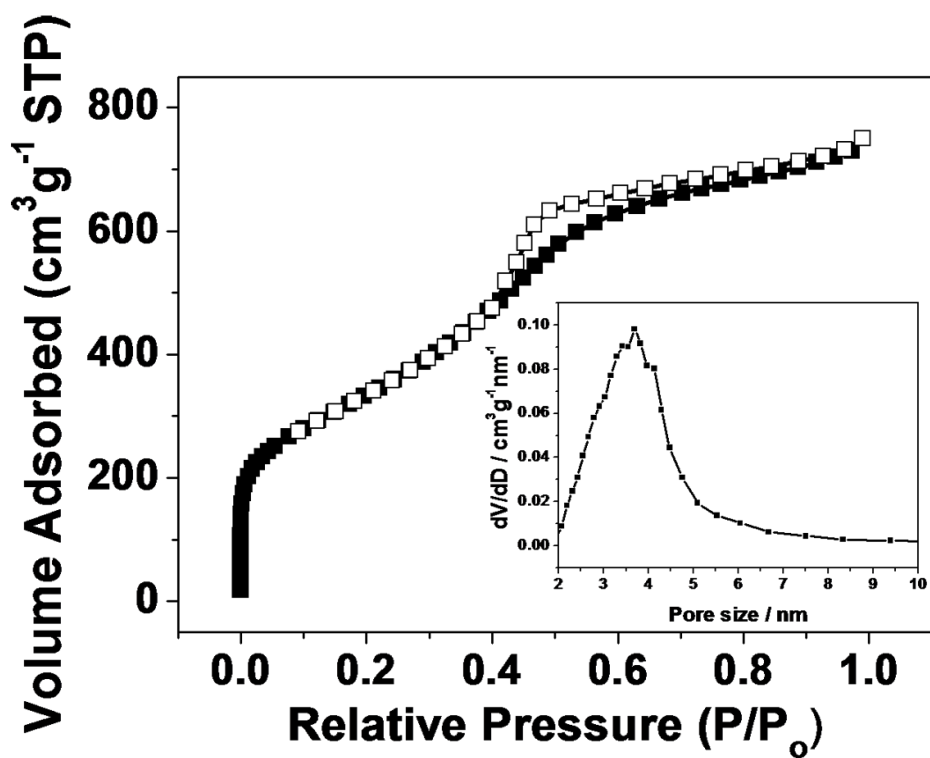

Fig. S3 Typical nitrogen adsorption-desorption isotherms at -196 °C and the derived PSD for CMK-3.

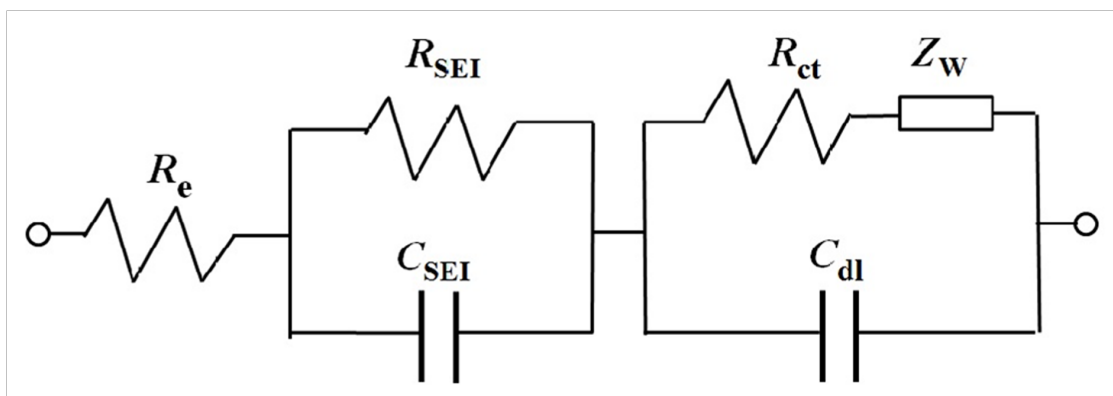

**Fig. S4** Equivalent circuit proposed for analysis of Nyquist plots of HCMSC and CMK-3 electrode/electrolyte interfaces.  $R_e$ ,  $R_{SEI}$ ,  $C_{SEI}$ ,  $R_{ct}$ ,  $Z_w$  and  $C_{dl}$  stand for the electrolyte resistance, the resistance and the capacitance of the surface film, the charge-transfer resistance, the Warburg impedance related to the diffusion of lithium and the double-layer capacitance, respectively.
